# Supplementary material for: 23pWH-2 層状化合物LnCoAsOの磁化、比熱および電気抵抗(23pWH 鉄砒素系超伝導(伝道・磁化・熱),領域8(強相関系:高温超伝導,強相関f電子系など))
Source: Royal Society of Chemistry journal article supplement (doi:10.1039/c9cp06839b), 2010-08-18
Supplement: c9cp06839b1.pdf [file c9cp06839b1.pdf]

## Supporting Information

### Large scale indium tin oxide (ITO) one dimensional gratings for ultrafast signal modulation in the visible

Michele Guizzardi, Silvio Bonfadini, Liliana Moscardi, Ilka Kriegel, Francesco Scotognella, Luigino Criante

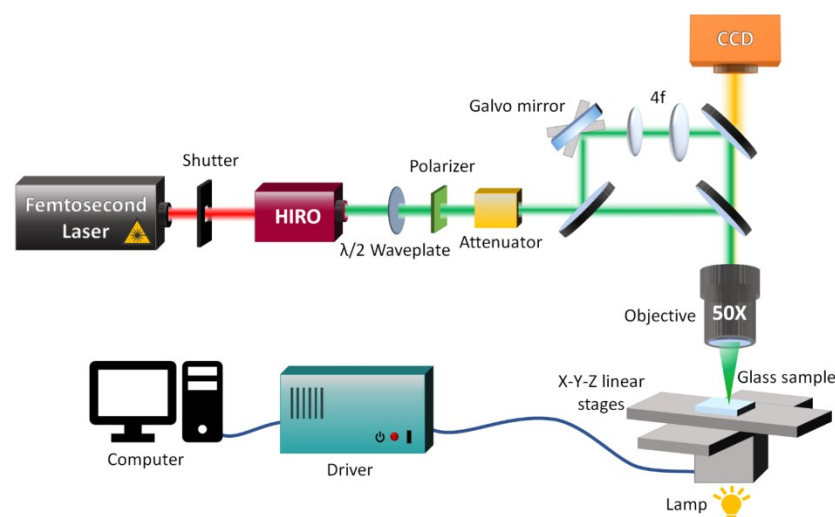

Figure S1. Sketch of the femtosecond laser micromachining apparatus

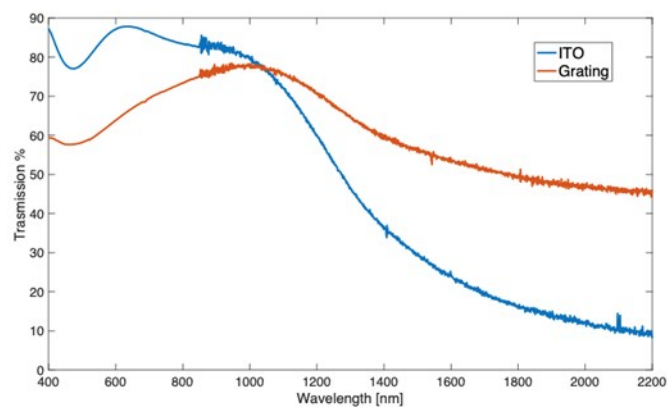

Figure S2. Transmission up to 2200 nm of ITO film and grating

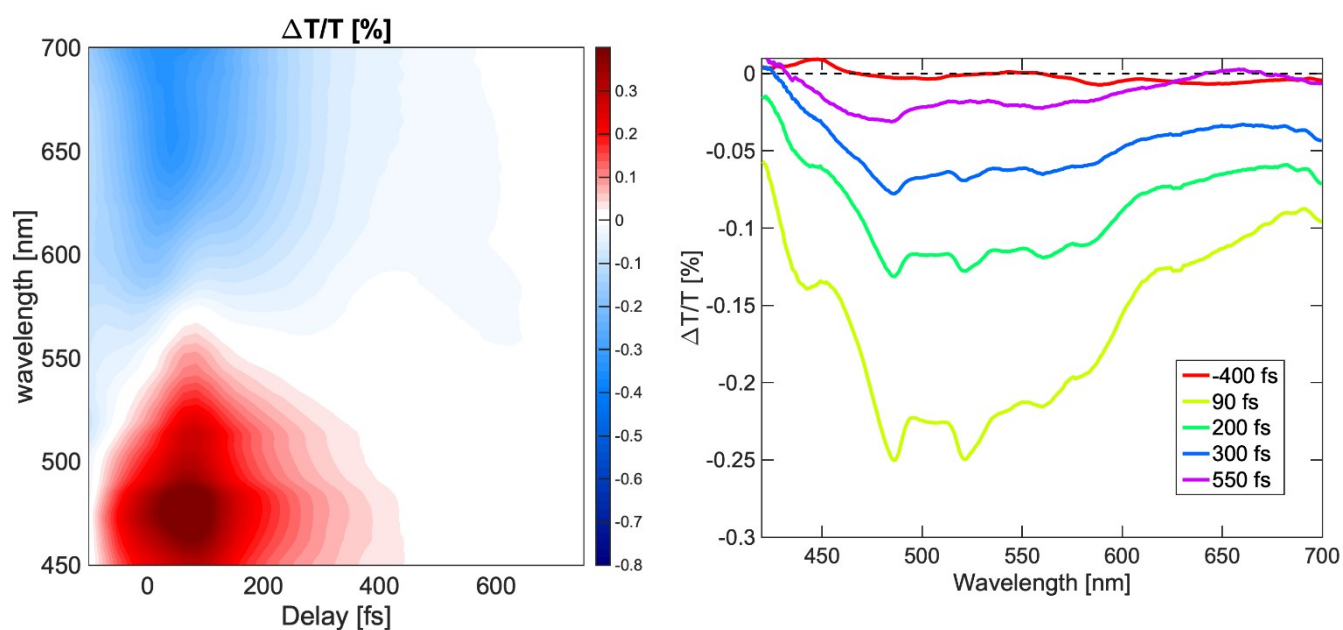

Figure S3. Differential transmission map and spectral evolution of the second grating.

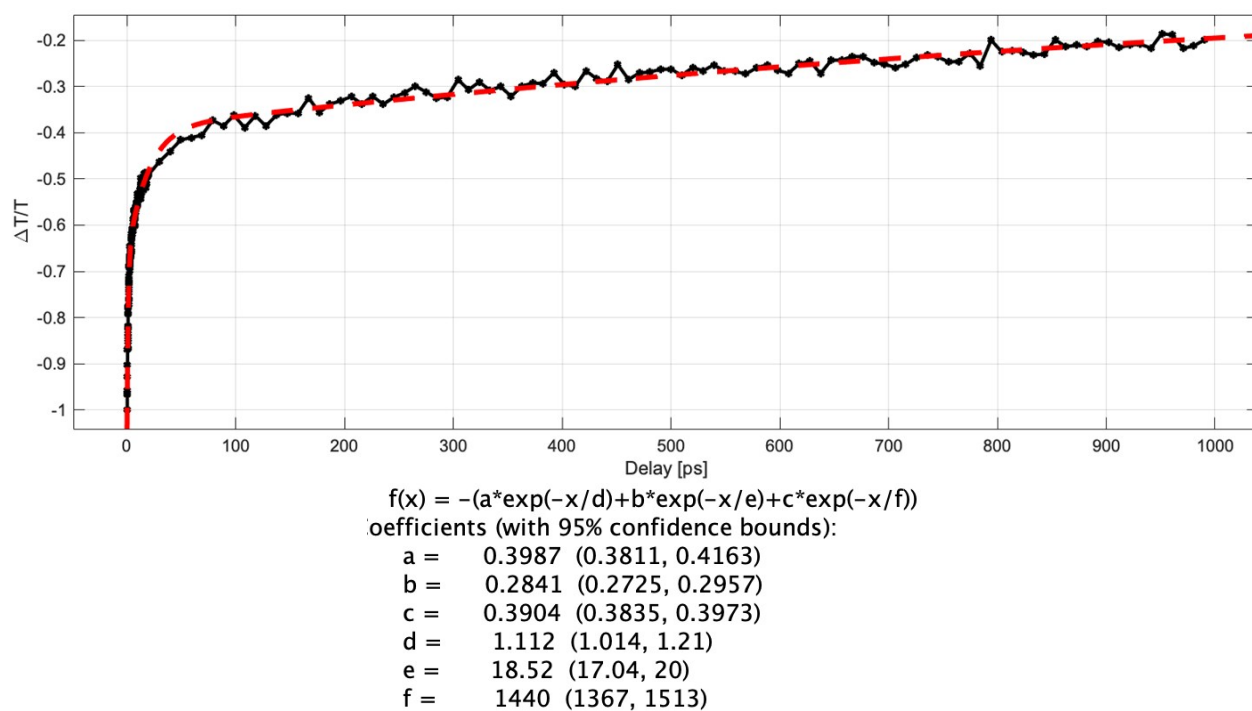

Figure S4. Tri-exponential fit of the interband grating dynamic with the result of the fit.
